# Supplementary material for: Effect of formulations and fermentation processes on volatile organic compounds and prebiotic potential of gluten-free bread fortified by spirulina (Arthrospira platensis)
Source: Royal Society of Chemistry journal article supplement (doi:10.1039/d1fo01239h), 2021-01-01
Supplement: d1fo01239h1.pdf [file d1fo01239h1.pdf]

Supplementary Table S1. Proximate flours contents.

| <b>Flour types</b>       | <b>Protein (%)</b> | <b>Carbohydrates (g)</b> | <b>Fiber (g)</b> | <b>Fats (g)</b> |
|--------------------------|--------------------|--------------------------|------------------|-----------------|
| <b>Rice<sup>1</sup></b>  | 7.0                | 79.0                     | 1.0              | 0.5             |
| <b>Maize<sup>2</sup></b> | 8.5                | 76.1                     | 2.1              | 1.3             |
| <b>Algae<sup>3</sup></b> | 31.0               | 3.1                      | 49.0             | 8.1             |

Commercial organic flours from: <sup>1</sup>rice (Molino Rossetto SpA, Pontelongo, Italy), <sup>2</sup>maize (Molino Rossetto SpA, Italy), <sup>3</sup>algae – Spirulina (Erbavoglio Production Srl, San Zeno Naviglio, Brescia).

Supplementary Table S2. Dough formulations.

| <b>Dough types</b> | <b>Rice<sup>1</sup> (g)</b> | <b>Maize<sup>2</sup> (g)</b> | <b>Algae<sup>3</sup> (g)</b> | <b>Sourdough (g)</b> | <b>NaCl (g)</b> | <b>sterile water (ml)</b> | <b>HPMC<sup>4</sup> (g)</b> |
|--------------------|-----------------------------|------------------------------|------------------------------|----------------------|-----------------|---------------------------|-----------------------------|
| <b>A</b>           | 308.61                      | 75.20                        | 15.87                        |                      | 4.00            | 340.00                    | 5.60                        |
| <b>YA+</b>         | 246.88                      | 60.16                        | 12.70                        | 140.00 <sup>5</sup>  | 3.20            | 272.00                    | 4.48                        |
| <b>S</b>           | 309.40                      | 90.60                        |                              |                      | 4.00            | 340.00                    | 5.60                        |
| <b>YS+</b>         | 255.52                      | 64.77                        |                              | 140.00 <sup>6</sup>  | 3.20            | 272.00                    | 4.48                        |

Commercial organic flours from: <sup>1</sup>rice (Molino Rossetto SpA, Pontelongo, Italy) <sup>2</sup>maize (Molino Rossetto SpA, Italy), <sup>3</sup>algae – Spirulina (Erbavoglio Production Srl, San Zeno Naviglio, Brescia); <sup>4</sup>HPMC = Hydroxy propyl methyl cellulose (Bioline Integratori, Canaro, Italy); <sup>5</sup>LAB fermented algae enriched dough; <sup>6</sup>LAB fermented maize/rice dough

Supplementary table S3. pH values

| <b>Sample</b> | <b>Baseline</b> |                     | <b>End of fermentation</b> |                     |
|---------------|-----------------|---------------------|----------------------------|---------------------|
| SX            | 6.24            | ± 0.04 <sup>c</sup> | 4.70                       | ± 0.08 <sup>b</sup> |
| SL            | 5.35            | ± 0.04 <sup>b</sup> | 3.60                       | ± 0.08 <sup>a</sup> |
| SY            | 5.95            | ± 0.03 <sup>c</sup> | 4.92                       | ± 0.15 <sup>b</sup> |
| AX            | 6.27            | ± 0.05 <sup>c</sup> | 5.35                       | ± 0.17 <sup>b</sup> |
| AL            | 5.22            | ± 0.04 <sup>c</sup> | 4.04                       | ± 0.12 <sup>a</sup> |
| AY            | 6.16            | ± 0.03 <sup>c</sup> | 4.98                       | ± 0.21 <sup>b</sup> |
| YS            | 5.80            | ± 0.03 <sup>c</sup> | 5.92                       | ± 0.06 <sup>c</sup> |
| YS+           | 5.29            | ± 0.09 <sup>b</sup> | 4.22                       | ± 0.09 <sup>a</sup> |
| YA            | 6.11            | ± 0.07 <sup>c</sup> | 5.05                       | ± 0.11 <sup>c</sup> |
| YA+           | 5.08            | ± 0.12 <sup>b</sup> | 4.31                       | ± 0.15 <sup>a</sup> |

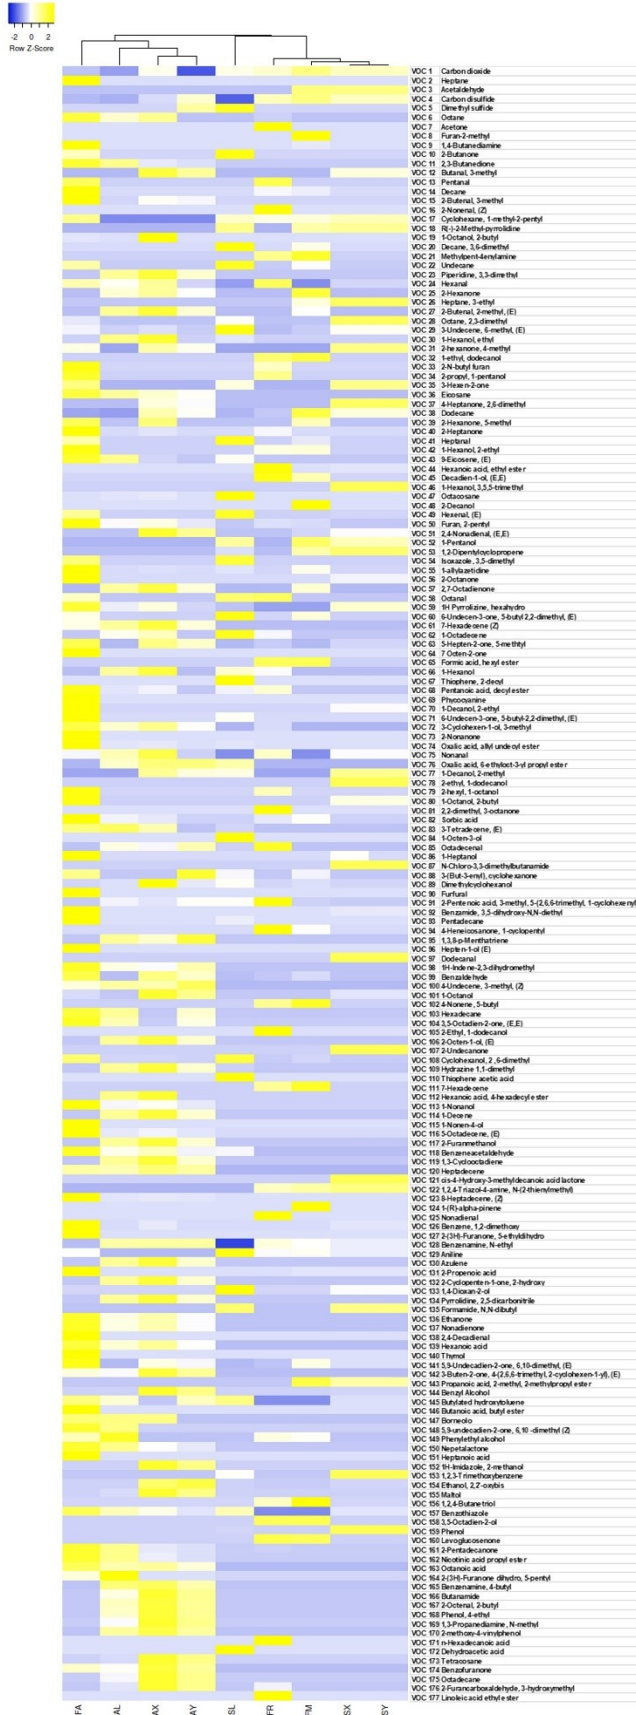

**Figure S1.** Heatmap of relative quantification by SPME GC-MS of means of VOCs of not fermented samples. Pearson dendrogram and complete linkage on independent variables. FA = Flours of Algae; FM = Flours of Maize; FR = Flours of Rice; AL, AX, AY = Algae type not fermented doughs; SL, SX, SY = Standard type not fermented doughs.

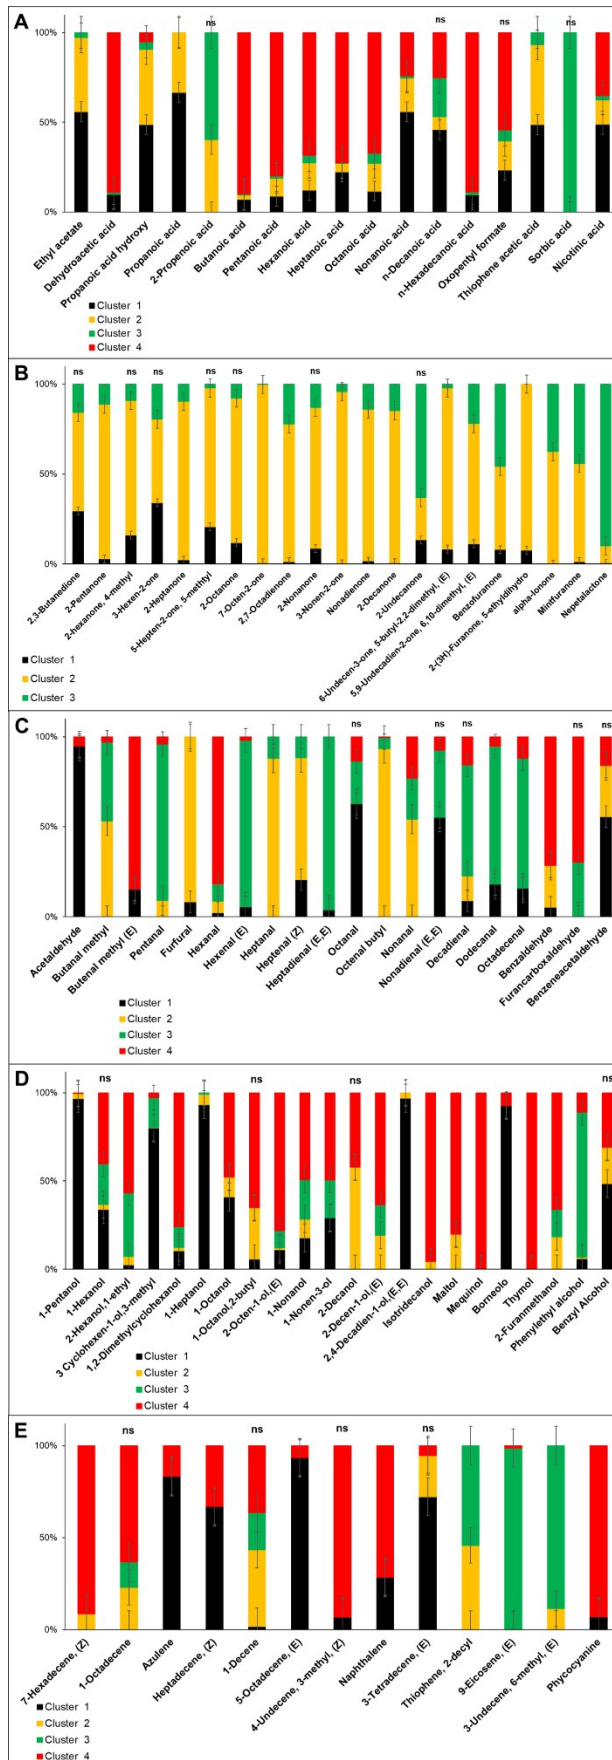

**Supplementary Figure 2.** K-means ( $p < 0.01$ ) of VOCs on samples. A) Organic acids; B) Ketones; C) Aldehydes; D) Alcohols; E) Alkenes. The cluster legends can be found from Figure 3 to Figure 7.

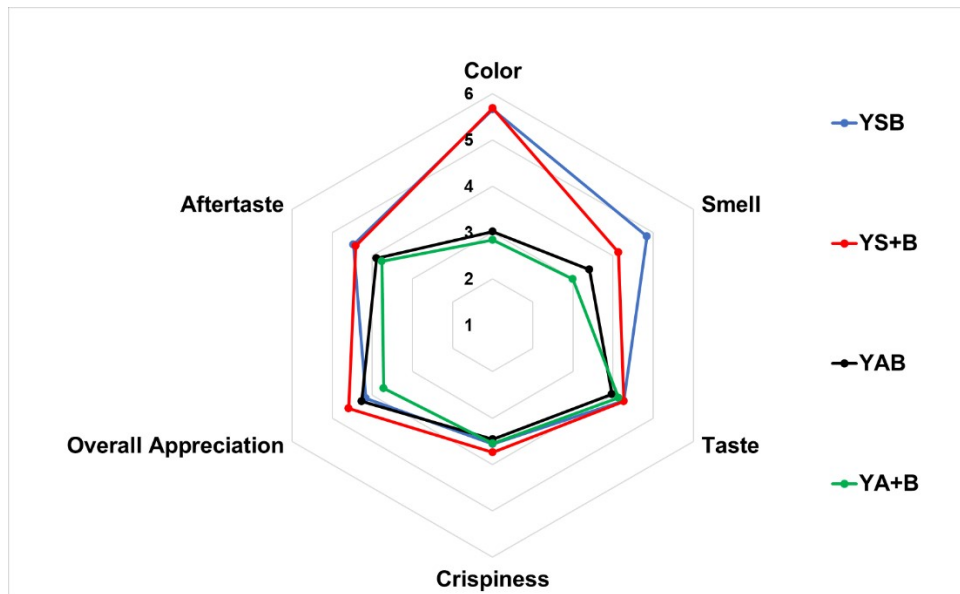

**Supplementary Figure 3.** Spider chart of two independent consumer's tests. Blue plot = YSB (ST bread fermented 6 h by yeast); red plot = YS+B (ST sourdough bread); black plot = YAB (AT bread fermented 6 h by yeast); green plot = YA+B (AT sourdough bread). 0 = unacceptable; 6 = excellent.
